# Supplementary material for: Optimizing Botulinum Toxin A Administration for Forehead Wrinkles: Introducing the Lines and Dots (LADs) Technique and a Predictive Dosage Model
Source: Toxins (Basel). 2024 Feb 17;16(2):109. doi: 10.3390/toxins16020109 (PMC10893323; doi:10.3390/toxins16020109)
Supplement: Supplementary file 1 [file toxins-16-00109-s001.zip › toxins-2848602-su.pdf]

# Supplementary Materials: Optimizing Botulinum Toxin A Administration for Forehead Wrinkles: Introducing the Lines and Dots (LADs) Technique and a Predictive Dosage Model

Table S1: Comparative Data of BoNT-A Efficacy, Dosage, and Patient Satisfaction Across Frontalis Muscle Pattern

| Picipant ID | Frontalis Muscle Pattern | Line Type | Severity Pre-Treatment | Severity Post-Treatment | BoNT-A Units | Reported Side Effects | Patient Satisfaction (0-10) |
|-------------|--------------------------|-----------|------------------------|-------------------------|--------------|-----------------------|-----------------------------|
| 1           | Full                     | Static    | Grade 4                | Grade 1                 | 20           | None                  | 10                          |
| 2           | Full                     | Static    | Grade 3                | Grade 0                 | 15           | Mild Swelling         | 9                           |
| 3           | Full                     | Static    | Grade 4                | Grade 1                 | 20           | Minor Bruising        | 8                           |
| 4           | Full                     | Static    | Grade 3                | Grade 0                 | 15           | None                  | 10                          |
| 5           | Full                     | Dynamic   | Grade 2                | Grade 0                 | 10           | None                  | 10                          |
| 6           | Full                     | Static    | Grade 3                | Grade 1                 | 15           | None                  | 10                          |
| 7           | Full                     | Dynamic   | Grade 2                | Grade 0                 | 10           | None                  | 10                          |
| 8           | Full                     | Static    | Grade 4                | Grade 1                 | 18           | None                  | 10                          |
| 9           | Full                     | Dynamic   | Grade 2                | Grade 0                 | 10           | None                  | 10                          |
| 10          | Full                     | Static    | Grade 4                | Grade 1                 | 18           | None                  | 10                          |
| 11          | V-shaped                 | Static    | Grade 3                | Grade 0                 | 15           | None                  | 10                          |
| 12          | V-shaped                 | Dynamic   | Grade 2                | Grade 0                 | 11           | None                  | 10                          |
| 13          | V-shaped                 | Static    | Grade 3                | Grade 1                 | 15           | None                  | 10                          |
| 14          | V-shaped                 | Dynamic   | Grade 2                | Grade 0                 | 11           | None                  | 10                          |
| 15          | V-shaped                 | Static    | Grade 3                | Grade 0                 | 15           | None                  | 10                          |
| 16          | V-shaped                 | Dynamic   | Grade 1                | Grade 0                 | 9            | None                  | 10                          |
| 17          | V-shaped                 | Static    | Grade 3                | Grade 1                 | 15           | None                  | 10                          |
| 18          | V-shaped                 | Dynamic   | Grade 1                | Grade 0                 | 9            | Mild Swelling         | 9                           |
| 19          | V-shaped                 | Static    | Grade 3                | Grade 0                 | 15           | None                  | 10                          |
| 20          | V-shaped                 | Dynamic   | Grade 1                | Grade 0                 | 10           | None                  | 10                          |
| 21          | Lateral                  | Static    | Grade 1                | Grade 0                 | 7            | None                  | 10                          |
| 22          | Lateral                  | Dynamic   | Grade 1                | Grade 0                 | 7            | None                  | 10                          |
| 23          | Lateral                  | Dynamic   | Grade 1                | Grade 0                 | 7            | None                  | 10                          |
| 24          | Central                  | Static    | Grade 3                | Grade 1                 | 15           | None                  | 10                          |
| 25          | Central                  | Static    | Grade 3                | Grade 1                 | 15           | None                  | 10                          |
| 26          | Central                  | dynamic   | Grade 3                | Grade 1                 | 13           | None                  | 10                          |
| 27          | Full                     | Dynamic   | Grade 2                | Grade 0                 | 10           | None                  | 10                          |
| 28          | Full                     | Static    | Grade 3                | Grade 0                 | 15           | None                  | 10                          |
| 29          | Full                     | Static    | Grade 4                | Grade 1                 | 18           | None                  | 10                          |
| 30          | Full                     | Dynamic   | Grade 2                | Grade 0                 | 10           | None                  | 10                          |
